# Supplementary material for: Eicosapentaenoic Acid Is Associated with Decreased Incidence of Alzheimer’s Dementia in the Oldest Old
Source: PubMed Central journal article supplement (PMC7912244; doi:10.3390/nu13020461), 2021-01-30
Supplement: nutrients-13-00461-s001.pdf [file nutrients-13-00461-s001.pdf]

## Online Supporting Material

**Table S1. Participants baseline characteristics**

| Characteristic                                | Study sample<br>n=1,264 |
|-----------------------------------------------|-------------------------|
| Age at baseline (y)                           | 84 ± 3                  |
| Female (n, %)                                 | 812 (64.0)              |
| BMI (kg/m <sup>2</sup> )                      | 25.9 ± 3.7              |
| <i>Missing values</i>                         | 29                      |
| APOE ε4 status (n, %)                         | 230 (18.2)              |
| <i>Missing values</i>                         | 41 (3.2)                |
| Duration to develop dementia (y)              | 5 ± 2                   |
| Cognitive decline score                       | -0.1 ± 2.1              |
| Serum parameters                              |                         |
| alpha-tocopherol (mg/L)                       | 15.7 ± 6.4              |
| <i>Missing values</i>                         | 11                      |
| Triglycerides (g/L)                           | 1.11 (IQR: 0.87-1.48)   |
| <i>Missing values</i>                         | 252                     |
| Total cholesterol (g/L)                       | 2.21 ± 0.48             |
| <i>Missing values</i>                         | 29                      |
| Education (n, %)                              |                         |
| Lower                                         | 734 (58.1)              |
| Middle                                        | 375 (29.7)              |
| High                                          | 155 (12.3)              |
| Physical activity index score* (n, %)         |                         |
| Low (0-1)                                     | 100 (7.9)               |
| Middle (2)                                    | 836 (66.1)              |
| High (3-5)                                    | 302 (23.9)              |
| <i>Missing values</i>                         | 26 (2.1)                |
| Smoking (n, %)                                |                         |
| Never                                         | 647 (51.2)              |
| Past                                          | 542 (42.9)              |
| Current                                       | 75 (5.9)                |
| Lipid lowering medication <sup>y</sup> (n, %) | 256 (20.3)              |

Values are means ± SD, numbers (valid percentages), or medians (interquartile range).

Abbreviations: g/L= grams per Liter; mg/L= milligrams per liter; n= number

of participants; y=years. \*The physical activity index includes six activities: bicycling, walking, swimming, gymnastics, chores/gardening, and a category of other physical leisure activities. Participants were given a score of 1 (i.e. once a week to each day = 1) or 0 (i.e. less than once a week or never= 0), which were summed up across the six activities to a total physical activity score (score: 0-6). <sup>y</sup>Statins and fibrates use.

**Table S2. Association between concentrations of serum arachidonic acid and incident all-cause dementia over a 7-year follow-up, stratified by APOE  $\epsilon$ 4 status**

| <i>APOE <math>\epsilon</math>4 non-carriers</i> |                           |                    |
|-------------------------------------------------|---------------------------|--------------------|
| <i>(n=1,024)</i>                                |                           |                    |
| <b>Fatty acid</b>                               | <b>All-cause dementia</b> |                    |
|                                                 | Model 1 HR (95%CI)        | Model 2 HR (95%CI) |
| Arachidonic acid (SD)                           | 0.91 (0.76; 1.07)         | 0.88 (0.74; 1.05)  |
| <i>P-value</i>                                  | 0.246                     | 0.153              |
| <i>APOE <math>\epsilon</math>4 carriers</i>     |                           |                    |
| <i>(n=240)</i>                                  |                           |                    |
| <b>Fatty acid</b>                               | <b>All-cause dementia</b> |                    |
|                                                 | Model 1 HR (95%CI)        | Model 2 HR (95%CI) |
| Arachidonic acid (SD)                           | 1.17 (0.91; 1.49)         | 1.18 (0.91; 1.53)  |
| <i>P-value</i>                                  | 0.229                     | 0.212              |

Based on imputed data. P for interaction=0.078.

Abbreviations: APOE  $\epsilon$ 4= apolipoprotein E  $\epsilon$ 4; CI= confidence interval.

Model 1: age, sex and education.

Model 2: model 1 plus BMI, physical activity, smoking, cognitive decline, alpha- tocopherol, triglycerides, total cholesterol and lipid lowering medication (i.e. statins and fibrates). A P-value <0.05 is considered to be statistical significant.

**Table S3. Association between concentrations of serum alpha-Linolenic acid and incident all-cause dementia over a 7-year follow-up, stratified by APOE ε4 status**

| <i>APOE ε4 non-carriers</i> |                           |                    |
|-----------------------------|---------------------------|--------------------|
| (n=1,024)                   |                           |                    |
| <b>Fatty acid</b>           | <b>All-cause dementia</b> |                    |
|                             | Model 1 HR (95%CI)        | Model 2 HR (95%CI) |
| alpha-Linolenic acid (SD)   | 0.86 (0.71; 1.05)         | 0.90 (0.75; 1.09)  |
| <i>P-value</i>              | 0.138                     | 0.293              |
| <i>APOE ε4 carriers</i>     |                           |                    |
| (n=240)                     |                           |                    |
| <b>Fatty acid</b>           | <b>All-cause dementia</b> |                    |
|                             | Model 1 HR (95%CI)        | Model 2 HR (95%CI) |
| alpha-Linolenic acid (SD)   | 1.00 (0.76; 1.32)         | 0.96 (0.71; 1.29)  |
| <i>P-value</i>              | 0.978                     | 0.764              |

Based on imputed data. P for interaction=0.052.

Abbreviations: APOE ε4= apolipoprotein E ε4; CI= confidence interval.

Model 1: age, sex and education.

Model 2: model 1 plus BMI, physical activity, smoking, cognitive decline, alpha- tocopherol, triglycerides, total cholesterol and lipid lowering medication (i.e. statins and fibrates). A P-value <0.05 is considered to be statistical significant.

**Table S4. Association between concentrations of serum EPA and incident all-cause dementia over a 7-year follow-up, stratified by APOE  $\epsilon$ 4 status**

| <i>APOE <math>\epsilon</math>4 non-carriers</i> |                           |                    |
|-------------------------------------------------|---------------------------|--------------------|
| (n=1,024)                                       |                           |                    |
| <b>Fatty acid</b>                               | <b>All-cause dementia</b> |                    |
|                                                 | Model 1 HR (95%CI)        | Model 2 HR (95%CI) |
| Eicosapentaenoic acid (SD)                      | 0.75 (0.61; 0.92)         | 0.76 (0.61; 0.94)  |
| <i>P-value</i>                                  | <b>0.006</b>              | <b>0.010</b>       |
| <i>APOE <math>\epsilon</math>4 carriers</i>     |                           |                    |
| (n=240)                                         |                           |                    |
| <b>Fatty acid</b>                               | <b>All-cause dementia</b> |                    |
|                                                 | Model 1 HR (95%CI)        | Model 2 HR (95%CI) |
| Eicosapentaenoic acid (SD)                      | 1.08 (0.87; 1.33)         | 1.06 (0.86; 1.31)  |
| <i>P-value</i>                                  | 0.497                     | 0.592              |

Based on imputed data. P for interaction=0.004.

Abbreviations: APOE  $\epsilon$ 4= apolipoprotein E  $\epsilon$ 4; CI= confidence interval; EPA= Eicosapentaenoic acid.

Model 1: age, sex and education.

Model 2: model 1 plus BMI, physical activity, smoking, cognitive decline, alpha- tocopherol, triglycerides, total cholesterol and lipid lowering medication (i.e. statins and fibrates). A P-value <0.05 is considered to be statistical significant.

**Table S5. Association between concentrations of serum EPA and incident AD dementia over a 7-year follow-up, stratified by APOE  $\epsilon$ 4 status**

| <i>APOE <math>\epsilon</math>4 non-carriers</i> |                    |                    |
|-------------------------------------------------|--------------------|--------------------|
| <i>(n=994)</i>                                  |                    |                    |
| <b>Fatty acid</b>                               | <b>AD dementia</b> |                    |
|                                                 | Model 1 HR (95%CI) | Model 2 HR (95%CI) |
| Eicosapentaenoic acid (SD)                      | 0.66 (0.51; 0.84)  | 0.66 (0.51; 0.85)  |
| <i>P-value</i>                                  | <b>0.001</b>       | <b>0.001</b>       |
| <i>APOE <math>\epsilon</math>4 carriers</i>     |                    |                    |
| <i>(n=227)</i>                                  |                    |                    |
| <b>Fatty acid</b>                               | <b>AD dementia</b> |                    |
|                                                 | Model 1 HR (95%CI) | Model 2 HR (95%CI) |
| Eicosapentaenoic acid (SD)                      | 0.98 (0.74; 1.29)  | 0.98 (0.72; 1.32)  |
| <i>P-value</i>                                  | 0.888              | 0.868              |

Based on imputed data. P for interaction=0.021.

Abbreviations: AD= Alzheimer's disease; APOE  $\epsilon$ 4= apolipoprotein E  $\epsilon$ 4; CI= confidence interval; EPA= eicosapentaenoic acid.

Model 1: age, sex and education.

Model 2: model 1 plus BMI, physical activity, smoking, cognitive decline, alpha- tocopherol, triglycerides, total cholesterol and lipid lowering medication (i.e. statins and fibrates). A P-value <0.05 is considered to be statistical significant.

**Table S6. Association between proportions of serum EPA and incident all-cause dementia over a 7-year follow-up, stratified by APOE  $\epsilon$ 4 status**

| <i>APOE <math>\epsilon</math>4 non carriers</i> |                           |                    |
|-------------------------------------------------|---------------------------|--------------------|
| (n=1,024)                                       |                           |                    |
| <b>Fatty acid</b>                               | <b>All-cause dementia</b> |                    |
|                                                 | Model 1 HR (95%CI)        | Model 2 HR (95%CI) |
| Eicosapentaenoic acid (SD)                      | 0.86 (0.71; 1.02)         | 0.87 (0.73; 1.04)  |
| <i>P-value</i>                                  | <i>0.086</i>              | <i>0.128</i>       |
| <i>APOE <math>\epsilon</math>4 carriers</i>     |                           |                    |
| (n=240)                                         |                           |                    |
| <b>Fatty acid</b>                               | <b>All-cause dementia</b> |                    |
|                                                 | Model 1 HR (95%CI)        | Model 2 HR (95%CI) |
| Eicosapentaenoic acid (SD)                      | 1.07 (0.84; 1.35)         | 1.08 (0.85; 1.37)  |
| <i>P-value</i>                                  | <i>0.592</i>              | <i>0.521</i>       |

Based on imputed data. P for interaction=0.061.

Abbreviations: APOE  $\epsilon$ 4= apolipoprotein E  $\epsilon$ 4; CI= confidence interval; EPA= eicosapentaenoic acid.

Model 1: age, sex and education.

Model 2: model 1 plus BMI, physical activity, smoking, cognitive decline, alpha- tocopherol, triglycerides, total cholesterol and lipid lowering medication (i.e. statins and fibrates). A P-value <0.05 is considered to be statistical significant.

**Table S7. Association between proportions of serum EPA and incident AD dementia over a 7-year follow-up, stratified by APOE  $\epsilon$ 4 status**

| <i>APOE <math>\epsilon</math>4 non-carriers</i> |                    |                    |
|-------------------------------------------------|--------------------|--------------------|
| <i>(n=994)</i>                                  |                    |                    |
| <b>Fatty acid</b>                               | <b>AD dementia</b> |                    |
|                                                 | Model 1 HR (95%CI) | Model 2 HR (95%CI) |
| Eicosapentaenoic acid (SD)                      | 0.79 (0.63; 0.97)  | 0.80 (0.65; 0.99)  |
| <i>P-value</i>                                  | <b>0.028</b>       | <b>0.042</b>       |
| <i>APOE <math>\epsilon</math>4 carriers</i>     |                    |                    |
| <i>(n=227)</i>                                  |                    |                    |
| <b>Fatty acid</b>                               | <b>AD dementia</b> |                    |
|                                                 | Model 1 HR (95%CI) | Model 2 HR (95%CI) |
| Eicosapentaenoic acid (SD)                      | 0.98 (0.73; 1.32)  | 1.03 (0.76; 1.41)  |
| <i>P-value</i>                                  | 0.912              | 0.868              |

Based on imputed data. P for interaction=0.067.

Abbreviations: AD= Alzheimer's disease; APOE  $\epsilon$ 4= apolipoprotein E  $\epsilon$ 4; CI= confidence interval; EPA= eicosapentaenoic acid;

Model 1: age, sex and education.

Model 2: model 1 plus BMI, physical activity, smoking, cognitive decline, alpha- tocopherol, triglycerides, total cholesterol and lipid lowering medication (i.e. statins and fibrates). A P-value <0.05 is considered to be statistical significant.



**Table S8. Specification of the multiple imputation procedure**

|                                                                                           |                                                                                                                                                                                                                                                                                                                                                                                                                                                                                                                                                                                                                                                                                                                                                      |
|-------------------------------------------------------------------------------------------|------------------------------------------------------------------------------------------------------------------------------------------------------------------------------------------------------------------------------------------------------------------------------------------------------------------------------------------------------------------------------------------------------------------------------------------------------------------------------------------------------------------------------------------------------------------------------------------------------------------------------------------------------------------------------------------------------------------------------------------------------|
| Software                                                                                  | IBM SPSS Statistics for Windows (Release 23)                                                                                                                                                                                                                                                                                                                                                                                                                                                                                                                                                                                                                                                                                                         |
| Imputation method                                                                         | Fully conditional specification (Markov chain Monte Carlo method)                                                                                                                                                                                                                                                                                                                                                                                                                                                                                                                                                                                                                                                                                    |
| Key settings                                                                              | Maximum iterations: 20                                                                                                                                                                                                                                                                                                                                                                                                                                                                                                                                                                                                                                                                                                                               |
| Imputed data sets                                                                         | 10                                                                                                                                                                                                                                                                                                                                                                                                                                                                                                                                                                                                                                                                                                                                                   |
| Variables included in the imputation procedure (imputed or used as predictors of missing) | Linoleic acid (%); Linoleic acid ( $\mu\text{Mol/L}$ ); DGLA (%); DGLA ( $\mu\text{Mol/L}$ ); Arachidonic acid (%); Arachidonic acid ( $\mu\text{Mol/L}$ ); alpha-Linoleic acid (%); alpha-Linoleic acid ( $\mu\text{Mol/L}$ ); EPA (%); EPA ( $\mu\text{Mol/L}$ ); DHA (%); DHA ( $\mu\text{Mol/L}$ ); Follow up 3 aggregated variable: Healthy controls, MCI, dementia variable; Incident AD dementia FU8; incident all-cause dementia FU8; vascular dementia FU8; sex; age at FU3; <i>APOE</i> $\epsilon 4$ ; education; body weight at FU3 (kg); height at FU3 (cm); smoking; physical activity at FU3; CERAD delate recall baseline score; CERAD delate recall FU3 score; cholesterol (mg/dl); triglycerides (mg/dl); lipid lowering medication |
| Additionally added predictive variables to increase plausibility of missing at random     | Body weight at FU4 (kg); height at FU4 (cm); HDL cholesterol FU3 (mg/dl), LDL cholesterol (mg/dl) FU3; HbA1c; fasting state at blood sampling; systolic blood pressure (mmHg) FU3; diastolic blood pressure (mmHg) FU3; depression FU3; coronary heart disease FU3; myocard infarct FU3; heart failure FU3; TIA FU3; skull or brain trauma FU3; hyperlipidemia and hyper cholesterolemia FU3; ability to conduct chorus around the house FU3; hypertension FU3; diabetes mellitus (unspecified) FU3; kidney failure FU3; elevated blood pressure FU3; medication use FU2 and FU3                                                                                                                                                                     |
| Not normally distributed variables were treated with:                                     | Predictive mean matching                                                                                                                                                                                                                                                                                                                                                                                                                                                                                                                                                                                                                                                                                                                             |
| Binary/categorical variables were treated with:                                           | Logistic regression models                                                                                                                                                                                                                                                                                                                                                                                                                                                                                                                                                                                                                                                                                                                           |

Abbreviations: AD= Alzheimer's disease; *APOE*  $\epsilon 4$ ; Apolipoprotein E  $\epsilon 4$ ; CERAD= Consortium to Establish a Registry for Alzheimer's Disease; DGLA= Dihomo- $\gamma$ -linolenic acid; DHA= docosahexaenoic acid; EPA= Eicosapentaenoic acid; FU= follow up visit; HbA1c= Hemoglobine A1c; HDL= high density lipoprotein; LDL= low density lipoprotein; TIA= transient ischemic attack.
